# Supplementary material for: Characterization of Mesenchymal Stem Cell-Like Cells Derived From Human iPSCs via Neural Crest Development and Their Application for Osteochondral Repair
Source: Stem Cells Int. 2017 May 10;2017:1960965. doi: 10.1155/2017/1960965 (PMC5451770; doi:10.1155/2017/1960965)
Supplement: Supplementary file 2 [file 1960965.f2.xlsx]

## Sheet: Sheet1
	FACS antibodies
	Target (antigen)	Conjugate	Company	Catalog No.
	CD271	PE	BD	557196
	CD44	FITC	Biolegend	338804
	CD73	PE	Biolegend	344004
	CD90	FITC	Biolegend	328108
	CD105	APC	Biolegend	323208
	CD34	FITC	BD	555821
	CD45	PE	Biolegend	304007
	TRA-1-60	Alexa Fluor 488	Biolegend	330614
	rBC2LCN	FITC	Wako	180-02991
