# Supplementary material for: Characterization of Mesenchymal Stem Cell-Like Cells Derived From Human iPSCs via Neural Crest Development and Their Application for Osteochondral Repair
Source: Stem Cells Int. 2017 May 10;2017:1960965. doi: 10.1155/2017/1960965 (PMC5451770; doi:10.1155/2017/1960965)
Supplement: Supplementary file 3 [file 1960965.f3.xlsx]

## Sheet: Sheet1
	IHC antibodies
	Target Antigen	Company	Catalog No.	Antigen Retrieval	1st Ab dilution	1st Ab reaction
	COL1	abcam	ab6308	Protainase K, 5min	1/100	RT, 1hr
	COL2	Kyowa Pharma Chemical	F-57	Protainase K, 5min	1/500	RT, 1hr
	COL10	eBioscience	14-9771	Protainase K, 5min	1/500	RT, 1hr
	SOX9	Santa Cruz Biotech	sc-20095	(-)	1/100	4℃, O/N
	hVimentin	abcam	ab16700	(-)	1/100	RT, 1hr
	Ki-67	DAKO	M7240	citrate buffer (pH6.0), 95℃, 10min	1/100	4℃, O/N

## Sheet: Sheet1 (2)
	IHC antibodies
	Target Antigen	Company	Catalog No.	Antigen Retrieval	1st Ab dilution	1st Ab reaction
	COL1	abcam	ab6308	Protainase K, 5min	1/100	RT, 1hr
	COL2	Kyowa Pharma Chemical	F-57	Protainase K, 5min	1/500	RT, 1hr
	COL10	eBioscience	14-9771	Protainase K, 5min	1/500	RT, 1hr
	SOX9	Santa Cruz Biotech	sc-20095	(-)	1/100	4℃, O/N
	hVimentin	abcam	ab16700	(-)	1/100	RT, 1hr
	Ki-67	DAKO	M7240	citrate buffer (pH6.0), 95℃, 10min	1/100	4℃, O/N
