# Supplementary material for: Characterization of Mesenchymal Stem Cell-Like Cells Derived From Human iPSCs via Neural Crest Development and Their Application for Osteochondral Repair
Source: Stem Cells Int. 2017 May 10;2017:1960965. doi: 10.1155/2017/1960965 (PMC5451770; doi:10.1155/2017/1960965)
Supplement: Supplementary file 4 [file 1960965.f4.xlsx]

## Sheet: Sheet1
	List of TaqMan gene expression assays
	Gene symbol	assay code	threshhold
	GAPDH	Hs02758991_g1	0.5
	POU5F1	Hs00999632_g1	0.1
	NANOG	Hs04260366_g1	0.1
	Lin28a	Hs00702808_s1	0.1
	SOX2	Hs00602736_s1	0.1
	p16	Hs00923894_m1	0.5
	TFAP2A	Hs01029413_m1	0.5
	Nestin	Hs04187831_g1	0.5
	Sox10	Hs00366918_m1	0.1
	Pax3	Hs00240950_m1	0.1
	CD271	Hs00609976_m1	0.5
	CD140a, PDGFRa	Hs00998026_m1	0.5
	CD140b, PDGFRb	Hs00387364_m1	0.5
	CD44	Hs01075861_m1	0.5
	CD73, NT5E	Hs00159686_m1	0.5
	CD34	Hs02576480_m1	0.5
	CD45	Hs04189704_m1	0.1
	COL1A2	Hs00164099_m1	0.1
	COL2A1	Hs00264051_m1	0.1
	COL10A1	Hs00166657_m1	0.1
	ACAN	Hs00153936_m1	0.1
	SOX9	Hs01001343_g1	0.1
	SOX5	Hs00753050_s1	0.5
	SOX6	Hs00264525_m1	0.5
	Osterix	Hs01866874_s1	0.5
	Osteopontin	Hs00959010_m1	0.5
	RUNX2	Hs01047973_m1	0.5
	Addiponectin	Hs00605917_m1	0.5
	LPL	Hs00173425_m1	0.5
	aP2	Hs01086177_m1	0.5

## Sheet: Sheet2
		Gene symbol	assay code	threshhold		Gene symbol	assay code	threshhold
		GAPDH	Hs02758991_g1	0.5		CD34	Hs02576480_m1	0.5
		POU5F1	Hs00999632_g1	0.1		CD45	Hs04189704_m1	0.1
		NANOG	Hs04260366_g1	0.1		COL1A2	Hs00164099_m1	0.1
		Lin28a	Hs00702808_s1	0.1		COL2A1	Hs00264051_m1	0.1
		SOX2	Hs00602736_s1	0.1		COL10A1	Hs00166657_m1	0.1
		p16	Hs00923894_m1	0.5		ACAN	Hs00153936_m1	0.1
		TFAP2A	Hs01029413_m1	0.5		SOX9	Hs01001343_g1	0.1
		Nestin	Hs04187831_g1	0.5		SOX5	Hs00753050_s1	0.5
		Sox10	Hs00366918_m1	0.1		SOX6	Hs00264525_m1	0.5
		Pax3	Hs00240950_m1	0.1		Osterix	Hs01866874_s1	0.5
		CD271	Hs00609976_m1	0.5		Osteopontin	Hs00959010_m1	0.5
		CD140a, PDGFRa	Hs00998026_m1	0.5		RUNX2	Hs01047973_m1	0.5
		CD140b, PDGFRb	Hs00387364_m1	0.5		Addiponectin	Hs00605917_m1	0.5
		CD44	Hs01075861_m1	0.5		LPL	Hs00173425_m1	0.5
		CD73, NT5E	Hs00159686_m1	0.5		aP2	Hs01086177_m1	0.5
